# Supplementary material
Source: MDPI journal article supplement (https://www.mdpi.com/2073-4433/7/8/105)
Supplement: s1 [file s1]

# Supplementary Materials: Seasonal Variation of Nitrate Concentration and Its Direct Radiative Forcing over East Asia. *Atmosphere* 2016, 7, 10.3390/atmos7080105

Jiawei Li and Zhiwei Han

**Table S1.** Monthly anthropogenic NO<sub>x</sub> emission used in the simulation (unit: Gg/month/grid). Emission data are extracted from the 0.25° × 0.25° inventory. Regional mean data are presented for East Asia (the whole domain), east China (20°N–42°N and 100°E–123°E), north China (35°N–42°N and 100°E–123°E), south China (20°N–35°N and 100°E–123°E), and north China Plain (36°N–42°N and 113°E–120°E).

| Month     | East Asia | East China | North China | South China | North China Plain | Beijing | Tianjin | Shijiazhuang |
|-----------|-----------|------------|-------------|-------------|-------------------|---------|---------|--------------|
| January   | 0.0168    | 0.26       | 0.32        | 0.24        | 0.60              | 11.45   | 11.01   | 14.65        |
| February  | 0.0148    | 0.23       | 0.29        | 0.20        | 0.53              | 10.46   | 9.81    | 11.76        |
| March     | 0.0168    | 0.26       | 0.33        | 0.23        | 0.60              | 8.76    | 8.64    | 14.60        |
| April     | 0.0160    | 0.25       | 0.31        | 0.23        | 0.57              | 7.15    | 7.56    | 14.43        |
| May       | 0.0162    | 0.26       | 0.32        | 0.23        | 0.59              | 7.47    | 7.11    | 14.76        |
| June      | 0.0162    | 0.26       | 0.33        | 0.23        | 0.62              | 7.44    | 7.84    | 15.54        |
| July      | 0.0164    | 0.26       | 0.33        | 0.23        | 0.63              | 7.70    | 8.16    | 16.15        |
| August    | 0.0163    | 0.26       | 0.32        | 0.24        | 0.60              | 7.75    | 8.26    | 14.87        |
| September | 0.0159    | 0.26       | 0.31        | 0.23        | 0.57              | 7.59    | 8.01    | 13.20        |
| October   | 0.0163    | 0.26       | 0.31        | 0.23        | 0.57              | 7.31    | 7.82    | 13.22        |
| November  | 0.0169    | 0.28       | 0.34        | 0.25        | 0.63              | 10.90   | 11.05   | 15.04        |
| December  | 0.0179    | 0.30       | 0.36        | 0.27        | 0.67              | 10.86   | 12.86   | 16.33        |

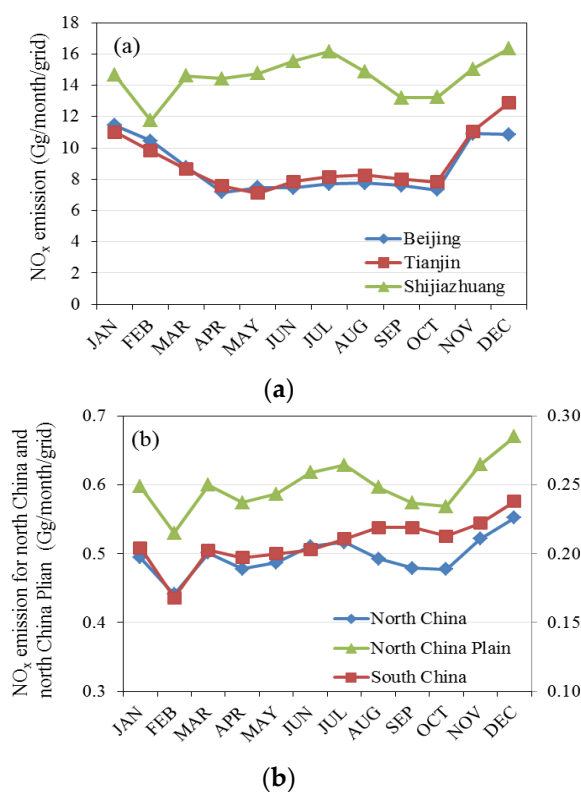

Figure S1. Cont.

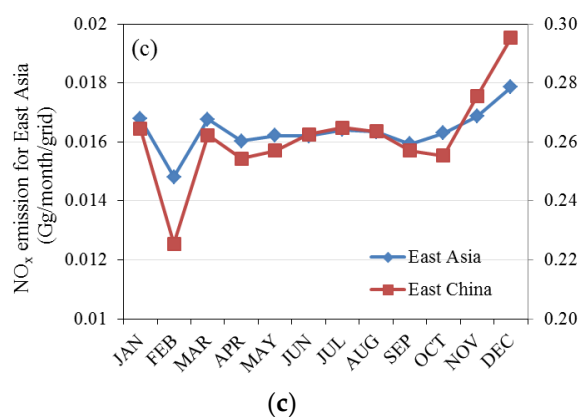

**Figure S1.** Monthly anthropogenic  $\text{NO}_x$  emission. (a) Beijing, Tianjin, and Shijiazhuang; (b) domain averages for north China ( $35^\circ\text{N}$ – $42^\circ\text{N}$  and  $100^\circ\text{E}$ – $123^\circ\text{E}$ ), south China ( $20^\circ\text{N}$ – $35^\circ\text{N}$  and  $100^\circ\text{E}$ – $123^\circ\text{E}$ ), and north China Plain ( $36^\circ\text{N}$ – $42^\circ\text{N}$  and  $113^\circ\text{E}$ – $120^\circ\text{E}$ ); (c) domain averages for East Asia (the whole domain) and east China ( $20^\circ\text{N}$ – $42^\circ\text{N}$  and  $100^\circ\text{E}$ – $123^\circ\text{E}$ ). Grid resolution is  $0.25^\circ \times 0.25^\circ$ .

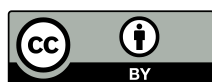

© 2016 by the authors; licensee MDPI, Basel, Switzerland. This article is an open access article distributed under the terms and conditions of the Creative Commons by Attribution (CC-BY) license (<http://creativecommons.org/licenses/by/4.0/>).
